# Supplementary material
Source: PubMed Central journal article supplement (PMC6389864)
Supplement: dey372_supplement_figure1.pdf [file dey372_supplement_figure1.pdf]

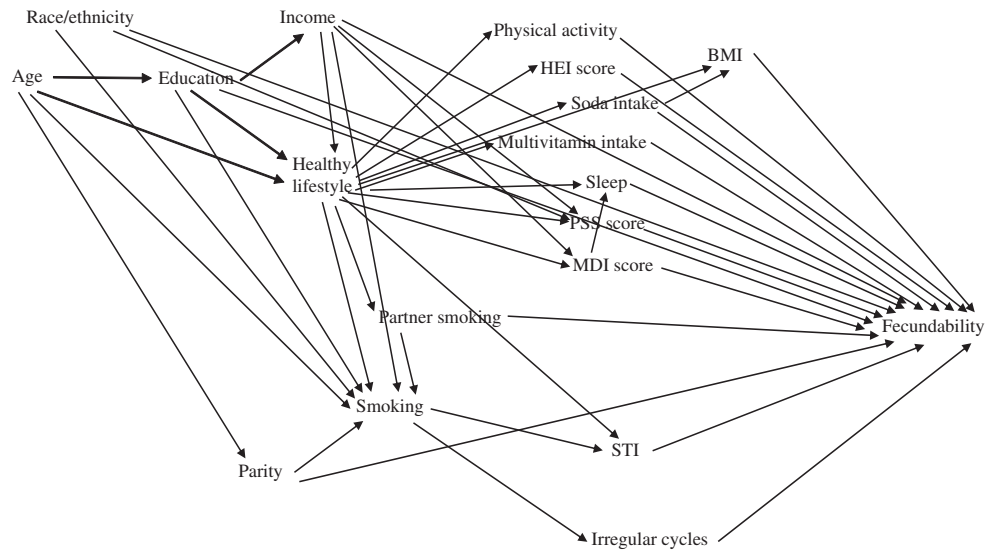

**Supplementary Figure S1** Directed acyclic graph of the association between female current active cigarette smoking and fecundability. HEI = healthy eating index; MDI = major depression inventory; STI = sexually transmitted infection.
