# Supplementary material
Source: PubMed Central journal article supplement (PMC6389864)
Supplement: dey372_supplement_table1.pdf [file dey372_supplement_table1.pdf]

**Supplementary Table S1** Association between female active smoking history at baseline and fecundability, stratified by menstrual cycles of attempt at study entry.

|                                    | Attempt time at study entry |                    |                      |               |                    |                      |
|------------------------------------|-----------------------------|--------------------|----------------------|---------------|--------------------|----------------------|
|                                    | 0–2 cycles                  |                    |                      | 3–6 cycles    |                    |                      |
|                                    | No. of cycles               | No. of pregnancies | Adjusted FR (95% CI) | No. of cycles | No. of pregnancies | Adjusted FR (95% CI) |
| Never smokers                      | 11 217                      | 1797               | Reference            | 5214          | 634                | Reference            |
| Former smokers                     | 2365                        | 312                | 0.88 (0.79, 0.99)    | 1210          | 135                | 1.04 (0.87, 1.25)    |
| Current occasional smokers         | 535                         | 66                 | 0.88 (0.70, 1.11)    | 386           | 34                 | 0.80 (0.56, 1.15)    |
| Current regular smokers            | 746                         | 82                 | 0.87 (0.69, 1.08)    | 657           | 71                 | 0.94 (0.73, 1.23)    |
| Former smokers                     |                             |                    |                      |               |                    |                      |
| Time since regular smoking (years) |                             |                    |                      |               |                    |                      |
| <1                                 | 184                         | 23                 | 0.92 (0.63, 1.34)    | 90            | 13                 | 1.32 (0.76, 2.28)    |
| 1                                  | 240                         | 30                 | 0.78 (0.55, 1.11)    | 132           | 21                 | 1.34 (0.88, 2.02)    |
| 2–4                                | 766                         | 96                 | 0.88 (0.73, 1.07)    | 328           | 39                 | 0.99 (0.72, 1.37)    |
| ≥5                                 | 1175                        | 163                | 0.89 (0.77, 1.04)    | 660           | 62                 | 0.96 (0.74, 1.24)    |
| Intensity (cigarettes/day)         |                             |                    |                      |               |                    |                      |
| <5                                 | 846                         | 119                | 0.92 (0.77, 1.09)    | 429           | 49                 | 1.02 (0.77, 1.36)    |
| 5–9                                | 640                         | 88                 | 0.91 (0.74, 1.11)    | 323           | 35                 | 0.99 (0.72, 1.37)    |
| ≥10                                | 879                         | 105                | 0.82 (0.68, 0.99)    | 458           | 51                 | 1.10 (0.84, 1.45)    |
| Duration (years) <sup>b</sup>      |                             |                    |                      |               |                    |                      |
| <10                                | 1158                        | 167                | 0.91 (0.78, 1.05)    | 568           | 69                 | 1.07 (0.83, 1.38)    |
| ≥10                                | 417                         | 52                 | 0.81 (0.62, 1.06)    | 160           | 26                 | 1.31 (0.83, 2.04)    |
| Current regular smokers            |                             |                    |                      |               |                    |                      |
| Intensity (cigarettes/day)         |                             |                    |                      |               |                    |                      |
| <5                                 | 137                         | 19                 | 1.12 (0.73, 1.71)    | 124           | 16                 | 1.00 (0.57, 1.75)    |
| 5–9                                | 267                         | 31                 | 0.84 (0.58, 1.21)    | 221           | 22                 | 0.79 (0.51, 1.23)    |
| ≥10                                | 342                         | 32                 | 0.78 (0.55, 1.10)    | 312           | 33                 | 1.04 (0.73, 1.48)    |
| Duration (years) <sup>b</sup>      |                             |                    |                      |               |                    |                      |
| <10                                | 99                          | 14                 | 1.06 (0.64, 1.75)    | 131           | 16                 | 0.91 (0.55, 1.52)    |
| ≥10                                | 376                         | 36                 | 0.78 (0.56, 1.09)    | 298           | 33                 | 0.89 (0.61, 1.30)    |

<sup>a</sup>Adjusted for age, race/ethnicity, education, annual household income, BMI, sugar-sweetened beverage intake, Healthy Eating Index score, multivitamin or folic acid supplement use, sleep duration, PSS-10 score, MDI score, parity, intercourse frequency and doing something to improve chances of conception.

<sup>b</sup>Restricted to women age 25–34 years.

FR = fecundability ratio.
