# Supplementary material
Source: PubMed Central journal article supplement (PMC6389864)
Supplement: dey372_supplement_table2.pdf [file dey372_supplement_table2.pdf]

**Supplementary Table SII Association between female active smoking history at baseline and fecundability, stratified by female age at baseline.**

|                                    | Female age at baseline (years) |                    |                      |               |                    |                      |
|------------------------------------|--------------------------------|--------------------|----------------------|---------------|--------------------|----------------------|
|                                    | <30                            |                    |                      | ≥30           |                    |                      |
|                                    | No. of cycles                  | No. of pregnancies | Adjusted FR (95% CI) | No. of cycles | No. of pregnancies | Adjusted FR (95% CI) |
| Never smokers                      | 7801                           | 1237               | Reference            | 8630          | 1194               | Reference            |
| Former smokers                     | 1209                           | 161                | 0.88 (0.75, 1.03)    | 2366          | 286                | 0.94 (0.83, 1.06)    |
| Current occasional smokers         | 443                            | 40                 | 0.71 (0.52, 0.97)    | 478           | 60                 | 1.00 (0.78, 1.28)    |
| Current regular smokers            | 799                            | 90                 | 0.88 (0.70, 1.10)    | 604           | 63                 | 0.97 (0.74, 1.28)    |
| Former smokers                     |                                |                    |                      |               |                    |                      |
| Time since regular smoking (years) |                                |                    |                      |               |                    |                      |
| <1                                 | 137                            | 13                 | 0.67 (0.39, 1.15)    | 137           | 23                 | 1.11 (0.81, 1.52)    |
| 1                                  | 181                            | 28                 | 0.91 (0.64, 1.30)    | 191           | 23                 | 0.97 (0.78, 1.22)    |
| 2–4                                | 530                            | 69                 | 0.89 (0.71, 1.11)    | 564           | 66                 | 0.97 (0.86, 1.09)    |
| ≥5                                 | 361                            | 51                 | 0.92 (0.71, 1.19)    | 1474          | 174                | 0.97 (0.88, 1.06)    |
| Intensity (cigarettes/day)         |                                |                    |                      |               |                    |                      |
| <5                                 | 447                            | 66                 | 0.94 (0.74, 1.19)    | 828           | 102                | 0.93 (0.77, 1.12)    |
| 5–9                                | 338                            | 41                 | 0.87 (0.65, 1.16)    | 625           | 82                 | 0.98 (0.79, 1.21)    |
| ≥10                                | 424                            | 54                 | 0.81 (0.63, 1.05)    | 913           | 102                | 0.92 (0.76, 1.12)    |
| Duration (years) <sup>b</sup>      |                                |                    |                      |               |                    |                      |
| <10                                | 901                            | 121                | 0.89 (0.74, 1.06)    | 825           | 115                | 1.00 (0.83, 1.20)    |
| ≥10                                | 154                            | 23                 | 0.90 (0.58, 1.39)    | 423           | 55                 | 0.91 (0.70, 1.18)    |
| Current regular smokers            |                                |                    |                      |               |                    |                      |
| Intensity (cigarettes/day)         |                                |                    |                      |               |                    |                      |
| <5                                 | 154                            | 23                 | 1.16 (0.79, 1.70)    | 107           | 12                 | 0.97 (0.53, 1.78)    |
| 5–9                                | 297                            | 33                 | 0.80 (0.56, 1.16)    | 191           | 20                 | 0.85 (0.53, 1.36)    |
| ≥10                                | 348                            | 34                 | 0.81 (0.57, 1.14)    | 306           | 31                 | 1.06 (0.74, 1.52)    |
| Duration (years) <sup>b</sup>      |                                |                    |                      |               |                    |                      |
| <10                                | 180                            | 25                 | 1.07 (0.72, 1.59)    | 50            | 5                  | 0.97 (0.42, 2.26)    |
| ≥10                                | 320                            | 30                 | 0.77 (0.53, 1.10)    | 354           | 39                 | 0.90 (0.64, 1.25)    |

<sup>a</sup>Adjusted for age, race/ethnicity, education, annual household income, BMI, sugar-sweetened beverage intake, Healthy Eating Index score, multivitamin or folic acid supplement use, sleep duration, PSS-10 score, MDI score, parity, intercourse frequency, doing something to improve chances of conception and current partner smoking. <sup>b</sup>Restricted to women age 25–34 years.
